# Supplementary material for: Characterization of a chemical modulation reactor (CMR) for the measurement of atmospheric concentrations of hydroxyl radicals with a laser-induced fluorescence instrument
Source: Copernicus journal article supplement (doi:10.5194/amt-2020-359), 2020-09-14
Supplement: Supplementary file 1 [file amt-2020-359-supplement.pdf]

# Characterization of a chemical modulation reactor (CMR) for the measurement of atmospheric concentrations of hydroxyl radicals with a laser-induced fluorescence instrument

Changmin Cho<sup>1</sup>, Andreas Hofzumahaus<sup>1</sup>, Hendrik Fuchs<sup>1</sup>, Hans-Peter Dorn<sup>1</sup>, Marvin Glowania<sup>1</sup>, Frank Holland<sup>1</sup>, Franz Rohrer<sup>1</sup>, Vaishali Vardhan<sup>1</sup>, Astrid Kiendler-Schar<sup>1</sup>, Andreas Wahner<sup>1</sup> and Anna Novelli<sup>1</sup>

<sup>1</sup>Forschungszentrum Jülich, Institute for Energy and Climate Research: Troposphere (IEK-8), 52425 Jülich, Germany

## Supporting information

**Table S1:** Operational conditions of the CMR for JULIAC campaigns

|                                      | Winter (I)                        | Spring (II)                       | Summer (III) and Autumn (IV)         |
|--------------------------------------|-----------------------------------|-----------------------------------|--------------------------------------|
| Period                               | 14 Jan. – 11 Feb.                 | 9 Apr. – 6 May                    | 4 Aug. – 2 Sep.<br>28 Oct. – 24 Nov. |
| Injector type                        | 1/8" injectors                    | 1/16" injectors                   | 1/8" injectors                       |
| Carrier flow                         | 500 sccm                          | 200 - 300 sccm                    | 500 sccm                             |
| Propane concentration                | 15 ppmv                           | 15 - 25 ppmv                      | 19 ppmv                              |
| Scavenging efficiency <sup>a,b</sup> | 91%                               | > 85%                             | 96%                                  |
| Transmission <sup>a,c</sup>          | 64 %                              | 75 %                              | 64 %                                 |
| Limit of detection <sup>d</sup>      | $0.7 \times 10^6 \text{ cm}^{-3}$ | $0.8 \times 10^6 \text{ cm}^{-3}$ | $0.6 \times 10^6 \text{ cm}^{-3}$    |

a Determined in clean synthetic air ( $k_{\text{OH}} = 0$ ).

b OH scavenging efficiency =  $(1 - \alpha) \times 100\%$ .

c OH transmission ( $\beta_{\text{N}_2}$ ) of the complete CMR.

d Signal-to-noise ratio = 1.

\* From 01.02.2019 to 11.02.2019 the CMR was not mounted.

**Table S2:** Summary of meteorological conditions and trace gases concentrations during JULIAC given as nighttime median values with  $1\sigma$  standard deviations of ambient variabilities

|                   | OH / $10^6 \text{ cm}^{-3}$ | NO / ppbv        | O <sub>3</sub> / ppbv | H <sub>2</sub> O / % <sup>a</sup> | k <sub>OH</sub> / s <sup>-1</sup> | k <sub>VOC</sub> <sup>b</sup> / s <sup>-1</sup> | T / °C |
|-------------------|-----------------------------|------------------|-----------------------|-----------------------------------|-----------------------------------|-------------------------------------------------|--------|
|                   |                             |                  | 22.8                  | 0.6                               | 6.3                               | 2.5                                             | 2.4    |
| 14 Jan. – 11 Feb. |                             |                  | (±10.3)               | (±0.2)                            | (±5.2)                            | (±2.0)                                          | (±3.8) |
|                   |                             |                  | 40.1                  | 0.7                               | 5.8                               | 3.2                                             | 10.0   |
| 9 Apr. – 6 May    |                             |                  | (±14.4)               | (±0.2)                            | (±1.9)                            | (±1.3)                                          | (±4.5) |
|                   | N/A <sup>c</sup>            | N/A <sup>c</sup> | 31.4                  | 1.4                               | 6.0                               | 3.8                                             | 17.7   |
| 4 Aug. – 2 Sep.   |                             |                  | (±14.5)               | (±0.3)                            | (±2.8)                            | (±2.2)                                          | (±3.8) |
|                   |                             |                  | 15.0                  | 0.7                               | 6.5                               | 2.4                                             | 4.6    |
| 28 Oct. – 24 Nov. |                             |                  | (±9.3)                | (±0.2)                            | (±3.8)                            | (±1.5)                                          | (±4.4) |

a Volume mixing ratio

b OH reactivity of non-methane VOCs, calculated as the difference between measured total k<sub>OH</sub> and the sum of calculated reactivities of CH<sub>4</sub>, CO, O<sub>3</sub>, NO, and NO<sub>2</sub>.

c Below the limit of the detection.

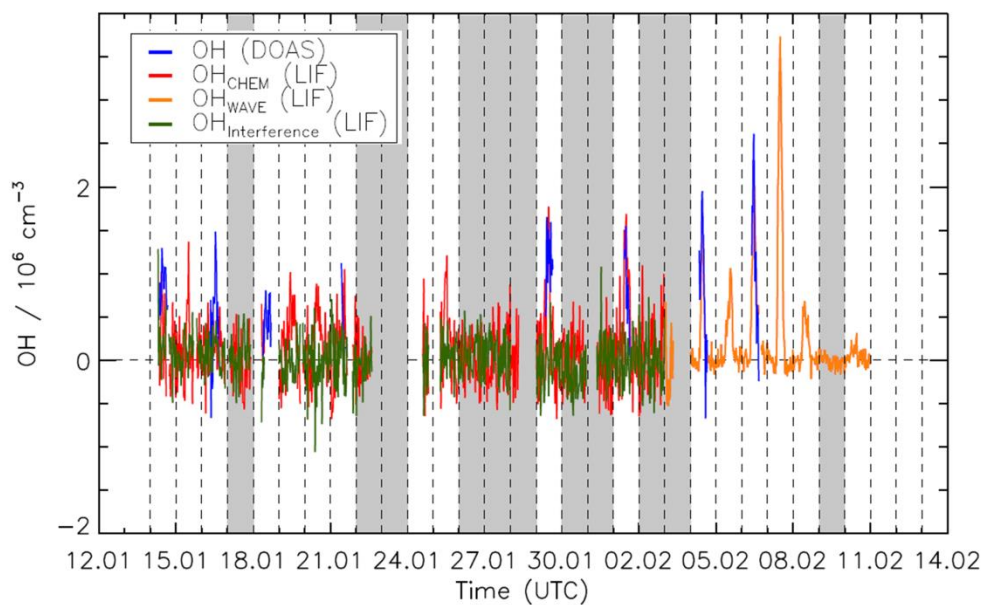

**Figure S1:** Measured OH concentration and OH interference by LIF with the CMR and DOAS during winter (I) intensive. All data sets are 30 min average. Dashed lines denote midnights. Grey boxes indicate when the roof was closed.

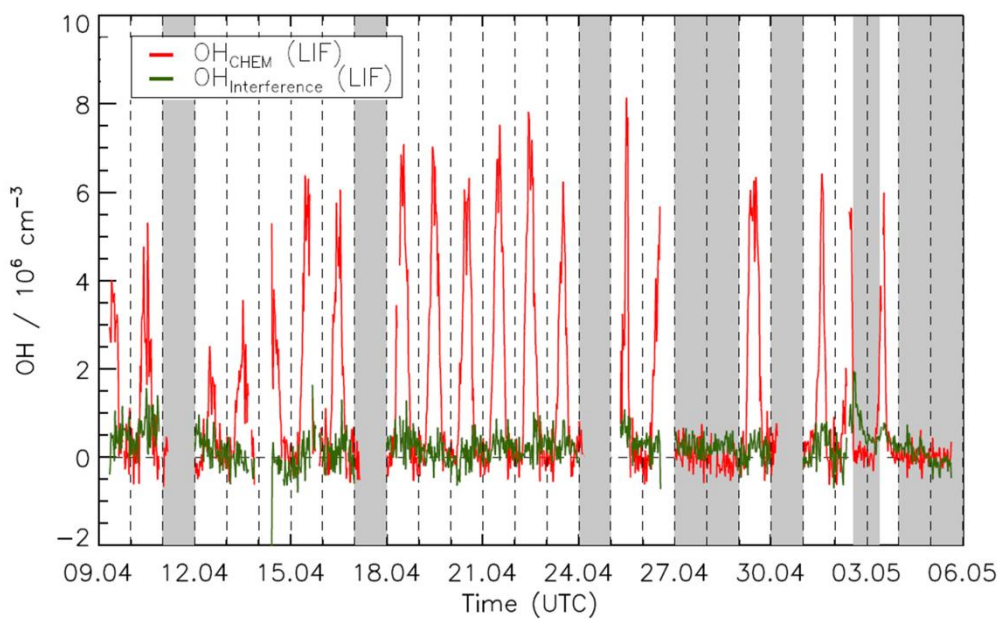

**Figure S2:** Measured OH concentration and OH interference by LIF with the CMR and DOAS during spring (II) intensive. All data sets are 30 min average. Dashed lines denote midnights. Grey boxes indicate when the roof was closed.

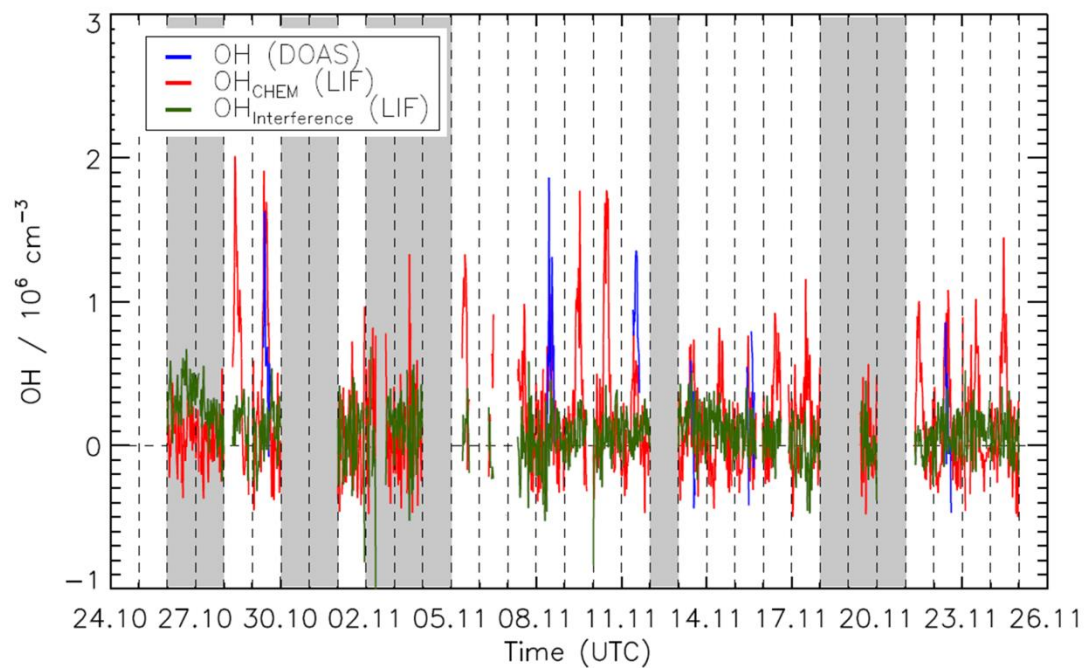

**Figure S3:** Measured OH concentration and OH interference by LIF with the CMR and DOAS during autumn (IV) intensive. All data sets are 30 min average. Dashed lines denote midnights. Grey boxes indicate when the roof was closed.
